# Supplementary material
Source: HighWire-hosted journal article supplement (http://jpet.aspetjournals.org/highwire/filestream/142842/field_highwire_adjunct_files/0/251959SupplData.pdf)
Supplement: 251959SupplData.pdf [file 251959SupplData.pdf]

## Modeling Corticosteroid Pharmacogenomics and Proteomics in Rat Liver

Vivaswath S. Ayyar, Siddharth Sukumaran, Debra C. DuBois, Richard R. Almon, William J. Jusko

The Journal of Pharmacology and Experimental Therapeutics

**TABLE S1.** Evidence of micro RNA interactions with target genes and glucocorticoid-regulation of micro RNAs.

| Species | Gene     | miRNA     | <sup>a</sup> Evidence for miRNA-gene interaction | Evidence for CS regulation of miRNA in cells lines or tissue |
|---------|----------|-----------|--------------------------------------------------|--------------------------------------------------------------|
| Rat     | ACSL     | miR-34a   | RA, WB, qPCR                                     | Yes (Belaya et al., 2018)                                    |
| Mouse   | ACTG1    | miR-let7b | RA                                               | No                                                           |
| Mouse   | ARG1     | miR-210   | RA, qPCR                                         | Yes (Martinez et al., 2017)                                  |
| Mouse   | ARG1     | miR-33    | RA, WB, qPCR                                     | No                                                           |
| Mouse   | ARG1     | miR-296   | WB                                               | No                                                           |
| Mouse   | ARG1     | miR-676   | WB                                               | No                                                           |
| Mouse   | ARG1     | miR-382   | WB                                               | No                                                           |
| Mouse   | ARG1     | miR-669   | WB                                               | No                                                           |
| Mouse   | ASS1     | miR-22    | qPCR                                             | Yes (Wang et al., 2014)                                      |
| Rat     | CYP2E1   | miR-212   | RA                                               | Yes (Balzano et al., 2017)                                   |
| Rat     | CYP2E1   | miR-132   | RA                                               | Yes (Yue et al., 2018)                                       |
| Mouse   | ENPP1    | miR-155   | qPCR                                             | Yes (Peshdary and Atlas, 2018)                               |
| Rat     | GPX1     | miR-181a  | RA, WB, qPCR                                     | Yes (Deng et al., 2016)                                      |
| Mouse   | GSTM1    | miR-96    | WB                                               | Yes (Riester et al., 2012)                                   |
| Mouse   | HADHB    | miR-124   | RA, qPCR                                         | Yes (Liang et al., 2017)                                     |
| Rat     | HNRNPK   | miR-450a  | WB                                               | No                                                           |
| Rat     | HSP90AA1 | miR-1     | WB                                               | Yes (Shen et al., 2013)                                      |
| Mouse   | HSPA5    | miR-181b  | RA, WB, qPCR                                     | No                                                           |
| Mouse   | HSPA5    | miR-30a   | RA                                               | Yes (Wu et al., 2014)                                        |
| Rat     | HSPA5    | miR-378a  | RA, qPCR                                         | No                                                           |
| Rat     | HSPA8    | miR-17    | RA                                               | Yes (Smith et al., 2010)                                     |
| Rat     | HSPD1    | miR-1     | WB, qPCR                                         | Yes (Shen et al., 2013)                                      |
| Mouse   | LDH1     | miR-181b  | RA, WB, qPCR                                     | No                                                           |
| Mouse   | LDHA     | miR-449a  | RA, WB, qPCR                                     | Yes (Nemoto et al., 2013)                                    |
| Rat     | LDHA     | miR-378a  | RA, qPCR                                         | No                                                           |
| Rat     | MTCH2    | miR-145   | RA, WB                                           | Yes (Shi et al., 2012)                                       |
| Mouse   | PDIA3    | miR-330   | RA, WB, qPCR                                     | No                                                           |
| Mouse   | PTBP1    | miR-124   | RA, qPCR                                         | Yes (Liang et al., 2017)                                     |
| Rat     | TAT      | miR-133a  | RA, WB, qPCR                                     | No                                                           |

RA = reporter assay; WB = Western Blot; qPCR = quantitative PCR

<sup>a</sup>Experimental method used to identify interaction (extracted from miRTarBase)

**TABLE S2.** Pharmacokinetic parameters for methylprednisolone (MPL) and glucocorticoid receptor (GR) dynamics.

| <b>Parameter (units)</b>                                   | <b>Definition</b>                                       | <b>Estimate (% CV)</b> |
|------------------------------------------------------------|---------------------------------------------------------|------------------------|
| <b><i>MPL Pharmacokinetics</i></b>                         |                                                         |                        |
| $CL$ (L/h/kg)                                              | Clearance                                               | 2.93 (0.89)            |
| $CL_D$ (L/h/kg)                                            | Distribution clearance                                  | 2.51 (1.94)            |
| $V_c$ (L/kg)                                               | Central volume of distribution                          | 0.803 (0.97)           |
| $V_T$ (L/kg)                                               | Peripheral volume of distribution                       | 0.974 (1.51)           |
| $F$                                                        | Bioavailability                                         | 0.2 (0.94)             |
| $Fr$                                                       | Fraction absorbed by $k_{a1}$                           | 0.725 (fixed)          |
| $k_{a1}$ ( $h^{-1}$ )                                      | Absorption rate constant                                | 1.82 (2.8)             |
| $k_{a2}$ ( $h^{-1}$ )                                      | Absorption rate constant                                | 0.54 (4.1)             |
| <b><i>Glucocorticoid Receptor Dynamics</i><sup>a</sup></b> |                                                         |                        |
| $k_{s,GRm}$ (fmol/g/h)                                     | Synthesis rate constant for GR mRNA                     | 3.2                    |
| $k_{d,GRm}$ ( $h^{-1}$ )                                   | Degradation rate constant for GR mRNA                   | 0.12                   |
| $k_{s,GR}$ (nM/h)(fmol/g) <sup>-1</sup>                    | Synthesis rate constant for receptor                    | 0.84                   |
| $IC_{50,GRm}$ (nM)                                         | DR <sub>n</sub> for 50% inhibition of GR mRNA synthesis | 123.7                  |
| $k_{d,GR}$ ( $h^{-1}$ )                                    | Degradation rate constant for receptor                  | 0.04                   |
| $k_{on}$ (nM <sup>-1</sup> ·h <sup>-1</sup> )              | Association rate constant                               | 0.019                  |
| $f_{mpl}$                                                  | Unbound fraction of MPL                                 | 0.23                   |
| $k_{re}$ ( $h^{-1}$ )                                      | DR <sub>n</sub> loss rate constant                      | 0.402                  |
| $R_f$                                                      | Fraction recycled                                       | 0.69                   |
| $k_T$ ( $h^{-1}$ )                                         | Translocation rate constant                             | 58.2                   |
| $GR_m(0)$ (fmol/g)                                         | GR mRNA initial concentration                           | 25.8                   |
| $GR(0)$ (nM)                                               | Free cytosolic receptor initial concentration           | 540.7                  |
| $DR(0)$ (nM)                                               | Drug-receptor complex initial concentration             | 0                      |
| $DR_n(0)$ (nM)                                             | Nuclear complex initial concentration                   | 0                      |

<sup>a</sup> Parameter values obtained from Hazra et al. (2007a)

**Figure S1.** Simultaneous fitting results of MPL pharmacokinetics in plasma (Eqs. 1-3) upon administration of 50 mg/kg intravenous (IV) injection of MPL (left panel) and following 50 mg/kg intramuscular (IM) injection (center panel). Solid lines represent model fittings, circles are means, and error bars are 1 standard deviation (SD) ( $n = 3 - 6$  rats per point). Simulated profiles of the driving forces (GR mRNA, free cytosolic receptor, and drug-receptor complex in the nucleus) controlling the gene-mediated effects of CS. Simulations are based on the model in Fig. 2. The parameters used are for MPL effects as listed in Table S2.

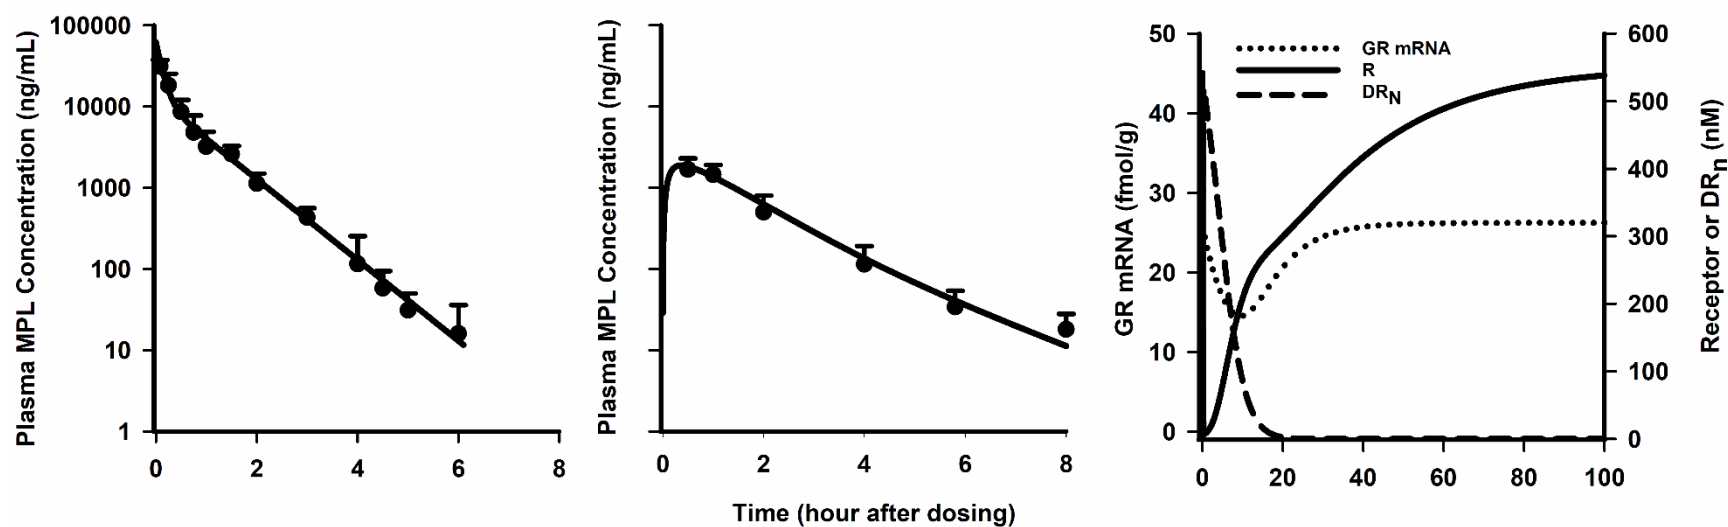

## References

- Balzano F, Deiana M, Dei Giudici S, Oggiano A, Pasella S, Pinna S, Mannu A, Deiana N, Porcu B, Masala AGE, Pileri PV, Scognamillo F, Pala C, Zinellu A, Carru C and Deiana L (2017) MicroRNA expression analysis of centenarians and rheumatoid arthritis patients reveals a common expression pattern. *Int J Med Sci* **14**:622-628.
- Belaya ZE, Grebennikova TA, Melnichenko GA, Nikitin AG, Solodovnikov AG, Brovkina OI, Grigoriev AU, Rozhinskaya LY and Dedov, II (2018) Effects of endogenous hypercortisolism on bone mRNA and microRNA expression in humans. *Osteoporos Int* **29**:211-221.
- Deng M, Tufan T, Raza MU, Jones TC and Zhu MY (2016) MicroRNAs 29b and 181a down-regulate the expression of the norepinephrine transporter and glucocorticoid receptors in PC12 cells. *J Neurochem* **139**:197-207.
- Liang YN, Tang YL, Ke ZY, Chen YQ, Luo XQ, Zhang H and Huang LB (2017) MiR-124 contributes to glucocorticoid resistance in acute lymphoblastic leukemia by promoting proliferation, inhibiting apoptosis and targeting the glucocorticoid receptor. *J Steroid Biochem Mol Biol* **172**:62-68.
- Martinez SR, Ma Q, Dasgupta C, Meng X and Zhang L (2017) MicroRNA-210 suppresses glucocorticoid receptor expression in response to hypoxia in fetal rat cardiomyocytes. *Oncotarget* **8**:80249-80264.
- Nemoto T, Mano A and Shibasaki T (2013) miR-449a contributes to glucocorticoid-induced CRF-R1 downregulation in the pituitary during stress. *Mol Endocrinol* **27**:1593-1602.
- Peshdary V and Atlas E (2018) Dexamethasone induced miR-155 up-regulation in differentiating 3T3-L1 preadipocytes does not affect adipogenesis. *Sci Rep* **8**:1264.
- Riester A, Issler O, Spyroglou A, Rodrig SH, Chen A and Beuschlein F (2012) ACTH-dependent regulation of microRNA as endogenous modulators of glucocorticoid receptor expression in the adrenal gland. *Endocrinology* **153**:212-222.
- Shen H, Liu T, Fu L, Zhao S, Fan B, Cao J and Li X (2013) Identification of microRNAs involved in dexamethasone-induced muscle atrophy. *Mol Cell Biochem* **381**:105-113.

- Shi M, Du L, Liu D, Qian L, Hu M, Yu M, Yang Z, Zhao M, Chen C, Guo L, Wang L, Song L, Ma Y and Guo N (2012) Glucocorticoid regulation of a novel HPV-E6-p53-miR-145 pathway modulates invasion and therapy resistance of cervical cancer cells. *J Pathol* **228**:148-157.
- Smith LK, Shah RR and Cidlowski JA (2010) Glucocorticoids modulate microRNA expression and processing during lymphocyte apoptosis. *J Biol Chem* **285**:36698-36708.
- Wang S, Ni Y, Guo F, Sun Z, Ahmed A and Zhao R (2014) Differential expression of hypothalamic fear- and stress-related genes in broiler chickens showing short or long tonic immobility. *Domest Anim Endocrinol* **47**:65-72.
- Wu J, Zheng C, Fan Y, Zeng C, Chen Z, Qin W, Zhang C, Zhang W, Wang X, Zhu X, Zhang M, Zen K and Liu Z (2014) Downregulation of microRNA-30 facilitates podocyte injury and is prevented by glucocorticoids. *J Am Soc Nephrol* **25**:92-104.
- Yue J, Wan F, Zhang Q, Wen P, Cheng L, Li P and Guo W (2018) Effect of glucocorticoids on miRNA expression spectrum of rat femoral head microcirculation endothelial cells. *Gene* **651**:126-133.
